# Supplementary material
Source: PubMed Central journal article supplement (PMC1891264)
Supplement: pnas_0703298104_16.pdf [file pnas_0703298104_16.pdf]

**Table 2. Computed VEE in aqueous solution for 9-methyl adenine PCM/TD-PBE0//PCM/PBE0/6-31G(d) calculations in aqueous solution**

| 6-31G(d)               |                   |          |             |
|------------------------|-------------------|----------|-------------|
|                        | Energy(Osc. Str.) | Orbitals | Description |
| S1                     | 5.19(0.25)        | H→L      | $\pi/\pi^*$ |
| S2                     | 5.31(0.02)        | H-1→L    | $n/\pi^*$   |
| S3                     | 5.42(0.05)        | H→L+1    | $\pi/\pi^*$ |
| S6                     | 6.28(0.21)        | H-2→L    | $\pi/\pi^*$ |
| 6-31+G(d,p)            |                   |          |             |
| S1                     | 5.05(0.31)        | H→L      | $\pi/\pi^*$ |
| S2                     | 5.31(0.01)        | H-1→L    | $n/\pi^*$   |
| S3                     | 5.33(0.04)        | H→L+1    | $\pi/\pi^*$ |
| S6                     | 6.11(0.28)        | H-2→L    | $\pi/\pi^*$ |
| 6-311+G(2d,2p)         |                   |          |             |
| S1                     | 5.00(0.30)        | H→L      | $\pi/\pi^*$ |
| S2                     | 5.27(0.03)        | H→L+1    | $\pi/\pi^*$ |
| S3                     | 5.29(0.0)         | H-1→L    | $n/\pi^*$   |
| S6                     | 6.05(0.28)        | H-2→L    | $\pi/\pi^*$ |
| 9MA·4 H <sub>2</sub> O |                   |          |             |
| S1                     | 5.09(0.24)        | H→L      | $\pi/\pi^*$ |
| S2                     | 5.37(0.12)        | H→L+1    | $\pi/\pi^*$ |
| S3                     | 5.61(0.00)        | H-1→L    | $n/\pi^*$   |
| S6                     | 6.30(0.18)        | H-2→L    | $\pi/\pi^*$ |

Experimental absorption maximum: 4.76 (1) Another strong feature at  $\approx 6$  eV (2)

1. Cohen, B., Hare, P.M. & Kohler. *B. J. Am. Chem. Soc.* **125**, 13594.
2. Clark, L.B., Peschel, G. G. & Tinoco, Jr. I. (1965) *J. Phys. Chem.* **69** 3615-3618.
