# Supplementary material
Source: PubMed Central journal article supplement (PMC1891264)
Supplement: pnas_0703298104_17.pdf [file pnas_0703298104_17.pdf]

**Table 3. (9-MA)<sub>2</sub> ground-state minimum. PCM/PBE0/6-31G(d) partial geometry optimizations in solution**

| Atomic number | Cartesian coordinates (in Å) |           |           |
|---------------|------------------------------|-----------|-----------|
| 7             | -2.536903                    | 1.198700  | -0.120730 |
| 6             | -3.140583                    | 0.401405  | -1.055895 |
| 7             | -2.820466                    | -0.867774 | -0.961887 |
| 6             | -1.944017                    | -0.904863 | 0.100365  |
| 6             | -1.752951                    | 0.368822  | 0.636788  |
| 6             | -1.253213                    | -1.955030 | 0.738097  |
| 7             | -0.463319                    | -1.660302 | 1.786946  |
| 6             | -0.356931                    | -0.381805 | 2.167484  |
| 7             | -0.950170                    | 0.694876  | 1.656106  |
| 6             | -2.668285                    | 2.631118  | 0.032745  |
| 1             | -2.219807                    | 3.155030  | -0.816550 |
| 1             | -2.147425                    | 2.918726  | 0.947696  |
| 1             | -3.722492                    | 2.908754  | 0.115458  |
| 1             | -3.825832                    | 0.820779  | -1.789130 |
| 7             | -1.385183                    | -3.243263 | 0.366115  |
| 1             | -1.807317                    | -3.455799 | -0.532231 |
| 1             | -0.721057                    | -3.916175 | 0.738357  |
| 1             | 0.312281                     | -0.201112 | 3.009885  |
| 7             | 1.615346                     | 2.068104  | -0.174053 |
| 6             | 0.845122                     | 2.078886  | -1.306331 |
| 7             | 0.668475                     | 0.897474  | -1.847728 |
| 6             | 1.408489                     | 0.059317  | -1.043479 |
| 6             | 2.002097                     | 0.765629  | 0.004310  |
| 6             | 1.682794                     | -1.322914 | -1.095116 |
| 7             | 2.487748                     | -1.849545 | -0.154021 |
| 6             | 2.979280                     | -1.043421 | 0.794117  |
| 7             | 2.796587                     | 0.265194  | 0.959206  |
| 6             | 1.886651                     | 3.174114  | 0.716774  |
| 1             | 2.887355                     | 3.057230  | 1.137886  |
| 1             | 1.836276                     | 4.109997  | 0.156288  |
| 1             | 1.154060                     | 3.192141  | 1.529648  |
| 1             | 0.418181                     | 3.007486  | -1.678717 |
| 7             | 1.208161                     | -2.127428 | -2.066390 |
| 1             | 1.282912                     | -3.131706 | -1.928522 |
| 1             | 0.457481                     | -1.794765 | -2.663782 |
| 1             | 3.622739                     | -1.530402 | 1.529613  |
