# Supplementary material
Source: PubMed Central journal article supplement (PMC1891264)
Supplement: pnas_0703298104_18.pdf [file pnas_0703298104_18.pdf]

**Table 4. (9-MA)<sub>2</sub> S<sub>CT</sub> state minimum. PCM/TD-PBE0/6-31G(d) partial geometry optimizations in solution**

| Atomic number | Cartesian coordinates (in Å) |           |           |
|---------------|------------------------------|-----------|-----------|
| 7             | 7.884208                     | -0.244544 | 1.237906  |
| 6             | 8.026405                     | -1.597313 | 1.495491  |
| 7             | 7.608725                     | -2.339279 | 0.466617  |
| 6             | 7.173686                     | -1.439058 | -0.464231 |
| 6             | 7.327628                     | -0.121880 | -0.006931 |
| 6             | 6.598866                     | -1.577835 | -1.767709 |
| 7             | 6.271369                     | -0.457965 | -2.441128 |
| 6             | 6.459373                     | 0.730828  | -1.881571 |
| 7             | 6.977461                     | 1.020525  | -0.632390 |
| 6             | 8.240562                     | 0.847676  | 2.105763  |
| 1             | 7.648058                     | 0.832585  | 3.028077  |
| 1             | 8.043292                     | 1.778839  | 1.569934  |
| 1             | 9.302015                     | 0.807060  | 2.372717  |
| 1             | 8.471280                     | -1.960860 | 2.412958  |
| 7             | 6.479027                     | -2.834044 | -2.405000 |
| 1             | 6.216210                     | -3.560693 | -1.739099 |
| 1             | 5.766416                     | -2.789369 | -3.132512 |
| 1             | 6.164103                     | 1.595876  | -2.474437 |
| 7             | 4.120143                     | 1.690986  | 1.157399  |
| 6             | 4.432863                     | 0.752971  | 2.068983  |
| 7             | 4.261021                     | -0.513230 | 1.649737  |
| 6             | 3.815598                     | -0.371844 | 0.401328  |
| 6             | 3.694269                     | 1.002919  | 0.040839  |
| 6             | 3.407515                     | -1.303990 | -0.605736 |
| 7             | 2.921512                     | -0.824154 | -1.778458 |
| 6             | 2.868742                     | 0.476218  | -1.949161 |
| 7             | 3.228298                     | 1.473652  | -1.079782 |
| 6             | 4.325102                     | 3.124080  | 1.242924  |
| 1             | 3.516645                     | 3.627352  | 0.710345  |
| 1             | 4.318748                     | 3.422778  | 2.292263  |
| 1             | 5.285614                     | 3.370524  | 0.782218  |
| 1             | 4.795285                     | 1.017439  | 3.061242  |
| 7             | 3.478040                     | -2.603716 | -0.429935 |
| 1             | 3.177988                     | -3.234272 | -1.179072 |
| 1             | 3.844637                     | -3.008637 | 0.435197  |
| 1             | 2.477496                     | 0.823342  | -2.905253 |
