# Supplementary material
Source: PubMed Central journal article supplement (PMC1891264)
Supplement: pnas_0703298104_19.pdf [file pnas_0703298104_19.pdf]

**Table 5.** (9-MA)<sub>2</sub> S<sub>DEL</sub> state minimum. PCM/TD-PBE0/6-31G(d) partial geometry optimizations in solution

| Atomic number | Cartesian coordinates (in Å) |           |           |
|---------------|------------------------------|-----------|-----------|
| 7             | -2.482696                    | 1.272057  | -0.084298 |
| 6             | -3.106257                    | 0.510188  | -1.033826 |
| 7             | -2.807608                    | -0.794091 | -0.939084 |
| 6             | -1.956103                    | -0.863624 | 0.103796  |
| 6             | -1.720635                    | 0.411461  | 0.669460  |
| 6             | -1.256502                    | -1.946200 | 0.729440  |
| 7             | -0.467440                    | -1.685065 | 1.787419  |
| 6             | -0.320908                    | -0.430189 | 2.187702  |
| 7             | -0.905640                    | 0.700591  | 1.665439  |
| 6             | -2.570390                    | 2.703594  | 0.092683  |
| 1             | -2.165951                    | 3.224988  | -0.779838 |
| 1             | -1.982003                    | 2.967433  | 0.973308  |
| 1             | -3.610719                    | 3.004814  | 0.248023  |
| 1             | -3.780411                    | 0.944926  | -1.765396 |
| 7             | -1.398352                    | -3.217033 | 0.304985  |
| 1             | -1.856850                    | -3.403807 | -0.582669 |
| 1             | -0.777717                    | -3.930715 | 0.680096  |
| 1             | 0.340084                     | -0.263984 | 3.036254  |
| 7             | 1.656751                     | 2.048859  | -0.187511 |
| 6             | 0.865844                     | 2.093520  | -1.308728 |
| 7             | 0.667014                     | 0.884100  | -1.857010 |
| 6             | 1.358222                     | 0.043252  | -1.059651 |
| 6             | 1.993817                     | 0.731557  | 0.000438  |
| 6             | 1.582701                     | -1.369207 | -1.092456 |
| 7             | 2.387819                     | -1.921114 | -0.162316 |
| 6             | 2.915751                     | -1.145389 | 0.771210  |
| 7             | 2.765134                     | 0.209082  | 0.941119  |
| 6             | 2.012286                     | 3.147092  | 0.677909  |
| 1             | 2.797766                     | 2.804183  | 1.354106  |
| 1             | 2.384270                     | 3.989000  | 0.087398  |
| 1             | 1.148065                     | 3.467785  | 1.268763  |
| 1             | 0.472662                     | 3.028693  | -1.692764 |
| 7             | 1.026400                     | -2.153573 | -2.038408 |
| 1             | 1.193315                     | -3.155359 | -2.031006 |
| 1             | 0.405123                     | -1.763089 | -2.739250 |
| 1             | 3.555747                     | -1.637871 | 1.502770  |
