# Supplementary material
Source: PubMed Central journal article supplement (PMC1891264)
Supplement: pnas_0703298104_20.pdf [file pnas_0703298104_20.pdf]

**Table 6. (9-MA)<sub>2</sub> S<sub>B</sub> state minimum. PCM/TD-PBE0/6-31G(d) partial geometry optimizations in solution**

| Atomic number | Cartesian coordinates (in Å) |           |           |
|---------------|------------------------------|-----------|-----------|
| 7             | 1.682703                     | 2.040620  | -0.199402 |
| 6             | 0.880388                     | 2.084832  | -1.316844 |
| 7             | 0.672173                     | 0.876259  | -1.854637 |
| 6             | 1.450815                     | 0.042998  | -1.149274 |
| 6             | 2.112750                     | 0.726586  | -0.080148 |
| 6             | 1.504008                     | -1.403069 | -1.057957 |
| 7             | 2.280021                     | -1.994018 | -0.157391 |
| 6             | 3.039145                     | -1.210265 | 0.643884  |
| 7             | 2.812872                     | 0.170668  | 0.863030  |
| 6             | 1.999003                     | 3.107365  | 0.711635  |
| 1             | 0.480001                     | 3.019852  | -1.697903 |
| 7             | 0.789482                     | -2.136399 | -1.927684 |
| 1             | 0.845980                     | -3.152949 | -1.906211 |
| 1             | 0.226859                     | -1.687842 | -2.647492 |
| 1             | 3.711406                     | -1.699218 | 1.342378  |
| 1             | 1.683021                     | 2.830281  | 1.723727  |
| 1             | 3.075252                     | 3.311955  | 0.718597  |
| 1             | 1.465365                     | 4.008445  | 0.401913  |
| 7             | -2.482152                    | 1.283423  | -0.051028 |
| 6             | -3.126735                    | 0.515752  | -0.983368 |
| 7             | -2.842766                    | -0.763609 | -0.909258 |
| 6             | -1.947335                    | -0.839730 | 0.134248  |
| 6             | -1.707614                    | 0.422052  | 0.680394  |
| 6             | -1.253229                    | -1.912975 | 0.728278  |
| 7             | -0.440911                    | -1.653122 | 1.768588  |
| 6             | -0.297179                    | -0.384580 | 2.167723  |
| 7             | -0.871079                    | 0.715036  | 1.681586  |
| 6             | -2.553084                    | 2.718747  | 0.112603  |
| 1             | -3.813822                    | 0.963767  | -1.697473 |
| 7             | -1.396493                    | -3.189007 | 0.319574  |
| 1             | -1.840491                    | -3.374725 | -0.573976 |
| 1             | -0.722062                    | -3.871407 | 0.653900  |
| 1             | 0.392782                     | -0.233857 | 2.998877  |
| 1             | -2.093899                    | 3.227733  | -0.740171 |
| 1             | -2.005887                    | 2.978372  | 1.020448  |
| 1             | -3.593572                    | 3.039128  | 0.212871  |
