# Supplementary material
Source: PubMed Central journal article supplement (PMC1891264)
Supplement: pnas_0703298104_21.pdf [file pnas_0703298104_21.pdf]

**Table 7. (9-MA)<sub>3</sub> ground state minimum. PCM/PBE0/6-31G(d) partial geometry optimizations in solution**

| Atomic number | Cartesian coordinates (in Å) |           |           |
|---------------|------------------------------|-----------|-----------|
| 7             | 4.268228                     | 1.130163  | 0.722409  |
| 6             | 4.710168                     | 0.125409  | 1.540892  |
| 7             | 4.447523                     | -1.080296 | 1.094542  |
| 6             | 3.791138                     | -0.853003 | -0.095313 |
| 6             | 3.667398                     | 0.514554  | -0.343672 |
| 6             | 3.259269                     | -1.709539 | -1.080311 |
| 7             | 2.675485                     | -1.159104 | -2.160128 |
| 6             | 2.603982                     | 0.174524  | -2.241316 |
| 7             | 3.059280                     | 1.088888  | -1.387203 |
| 6             | 4.382928                     | 2.556973  | 0.931046  |
| 1             | 3.827001                     | 2.862682  | 1.822175  |
| 1             | 3.962340                     | 3.056198  | 0.056339  |
| 1             | 5.432253                     | 2.844891  | 1.040136  |
| 1             | 5.231159                     | 0.349220  | 2.468520  |
| 7             | 3.352402                     | -3.054086 | -1.009487 |
| 1             | 3.554374                     | -3.474863 | -0.107709 |
| 1             | 2.748931                     | -3.589262 | -1.627558 |
| 1             | 2.098603                     | 0.560310  | -3.127612 |
| 7             | 0.164216                     | 2.035737  | 0.206280  |
| 6             | 0.710737                     | 1.762111  | 1.431413  |
| 7             | 0.813983                     | 0.481593  | 1.698186  |
| 6             | 0.259716                     | -0.124382 | 0.592262  |
| 6             | -0.154152                    | 0.822713  | -0.344054 |
| 6             | 0.048098                     | -1.474862 | 0.244778  |
| 7             | -0.561170                    | -1.748741 | -0.924002 |
| 6             | -0.934899                    | -0.726282 | -1.701186 |
| 7             | -0.782002                    | 0.581041  | -1.500918 |
| 6             | -0.029429                    | 3.329439  | -0.406161 |
| 1             | -0.631734                    | 3.186649  | -1.305103 |
| 1             | -0.553636                    | 4.002283  | 0.277909  |
| 1             | 0.931629                     | 3.768967  | -0.689764 |
| 1             | 1.038837                     | 2.565138  | 2.087511  |
| 7             | 0.434807                     | -2.491042 | 1.030728  |
| 1             | 0.217142                     | -3.444253 | 0.762484  |
| 1             | 0.860270                     | -2.316793 | 1.933497  |
| 1             | -1.441453                    | -1.007279 | -2.625711 |
| 7             | -3.952095                    | 1.485217  | -0.523293 |
| 6             | -3.471323                    | 2.052666  | 0.627057  |
| 7             | -3.095771                    | 1.185984  | 1.536920  |
| 6             | -3.383306                    | -0.031555 | 0.961206  |
| 6             | -3.919953                    | 0.131053  | -0.316006 |
| 6             | -3.250653                    | -1.359326 | 1.415732  |
| 7             | -3.667151                    | -2.355779 | 0.613062  |
| 6             | -4.168850                    | -2.040743 | -0.586978 |
| 7             | -4.331096                    | -0.840823 | -1.140303 |
| 6             | -4.376791                    | 2.158510  | -1.730057 |
| 1             | -4.897927                    | 1.431643  | -2.355624 |
| 1             | -5.056335                    | 2.979332  | -1.486921 |
| 1             | -3.512458                    | 2.545491  | -2.278090 |
| 1             | -3.407407                    | 3.133432  | 0.729709  |
| 7             | -2.762768                    | -1.663374 | 2.631732  |
| 1             | -2.536734                    | -2.632711 | 2.831825  |
| 1             | -2.287846                    | -0.947757 | 3.171672  |
| 1             | -4.488581                    | -2.890526 | -1.193348 |
