# Supplementary material
Source: PubMed Central journal article supplement (PMC1891264)
Supplement: pnas_0703298104_22.pdf [file pnas_0703298104_22.pdf]

Table 8. (9-MA)<sub>3</sub> S<sub>CT</sub> state minimum. PCM/TD-PBE0/6-31G(d) partial geometry optimizations in solution

| Atomic number | Cartesian coordinates (in Å) |           |           |
|---------------|------------------------------|-----------|-----------|
| 7             | 4.223970                     | 1.156009  | 0.737272  |
| 6             | 4.661071                     | 0.167445  | 1.603361  |
| 7             | 4.409104                     | -1.052811 | 1.121883  |
| 6             | 3.779566                     | -0.838354 | -0.071245 |
| 6             | 3.645359                     | 0.533103  | -0.335999 |
| 6             | 3.239243                     | -1.714636 | -1.065023 |
| 7             | 2.664532                     | -1.167534 | -2.153585 |
| 6             | 2.587585                     | 0.152762  | -2.268225 |
| 7             | 3.042652                     | 1.118472  | -1.390034 |
| 6             | 4.335602                     | 2.579605  | 0.920304  |
| 1             | 3.778445                     | 2.911682  | 1.804179  |
| 1             | 3.921535                     | 3.065027  | 0.033621  |
| 1             | 5.382495                     | 2.880636  | 1.035162  |
| 1             | 5.183666                     | 0.403054  | 2.521260  |
| 7             | 3.390086                     | -3.118896 | -0.989559 |
| 1             | 3.351384                     | -3.436432 | -0.021503 |
| 1             | 2.644489                     | -3.579664 | -1.509456 |
| 1             | 2.100202                     | 0.532517  | -3.165591 |
| 7             | 0.133207                     | 2.057453  | 0.181756  |
| 6             | 0.658846                     | 1.781178  | 1.389063  |
| 7             | 0.766124                     | 0.471154  | 1.666154  |
| 6             | 0.276551                     | -0.119146 | 0.575242  |
| 6             | -0.159798                    | 0.837276  | -0.387704 |
| 6             | 0.062448                     | -1.488849 | 0.218076  |
| 7             | -0.544049                    | -1.767599 | -0.962932 |
| 6             | -0.910289                    | -0.765846 | -1.728669 |
| 7             | -0.775045                    | 0.579497  | -1.506008 |
| 6             | -0.032188                    | 3.355564  | -0.444985 |
| 1             | -0.655208                    | 3.223421  | -1.330305 |
| 1             | -0.517562                    | 4.042769  | 0.250572  |
| 1             | 0.944351                     | 3.740632  | -0.747326 |
| 1             | 0.969903                     | 2.570116  | 2.071536  |
| 7             | 0.417283                     | -2.478141 | 1.005130  |
| 1             | 0.237557                     | -3.444725 | 0.719399  |
| 1             | 0.879844                     | -2.308757 | 1.901528  |
| 1             | -1.399972                    | -1.025962 | -2.666011 |
| 7             | -3.948739                    | 1.462893  | -0.521097 |
| 6             | -3.466984                    | 2.051912  | 0.618169  |
| 7             | -3.076569                    | 1.199694  | 1.537021  |
| 6             | -3.347463                    | -0.029565 | 0.976761  |
| 6             | -3.891055                    | 0.111353  | -0.300893 |
| 6             | -3.195147                    | -1.352903 | 1.446008  |
| 7             | -3.587193                    | -2.362881 | 0.645307  |
| 6             | -4.087674                    | -2.068054 | -0.559872 |
| 7             | -4.272409                    | -0.874541 | -1.122698 |
| 6             | -4.426190                    | 2.117225  | -1.720946 |
| 1             | -4.933941                    | 1.369178  | -2.332145 |
| 1             | -5.129685                    | 2.911900  | -1.460932 |
| 1             | -3.592000                    | 2.537015  | -2.290929 |
| 1             | -3.425913                    | 3.134985  | 0.711491  |
| 7             | -2.679252                    | -1.642077 | 2.648535  |
| 1             | -2.547335                    | -2.612451 | 2.917093  |
| 1             | -2.329816                    | -0.911572 | 3.259663  |
| 1             | -4.385271                    | -2.928618 | -1.161848 |
