# Supplementary material
Source: PubMed Central journal article supplement (PMC1891264)

LUMO  
 $E = -.0176$

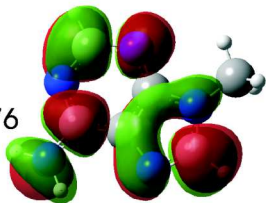

LUMO+1  
 $E = .0091$

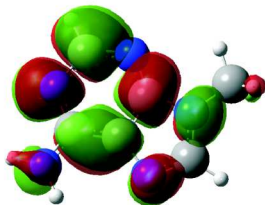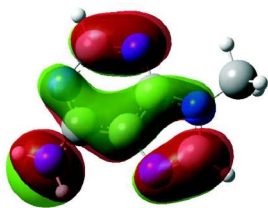

HOMO  
 $E = -.2324$

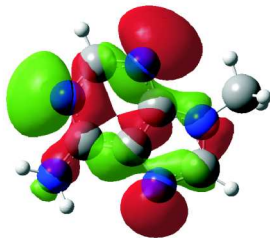

HOMO-1  
 $E = -.2711$

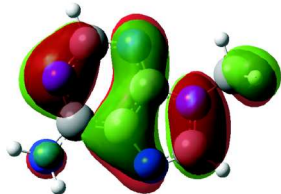

HOMO-2  
 $E = -.2760$

Supplement: pnas_0703298104_1.pdf [file pnas_0703298104_1.pdf]

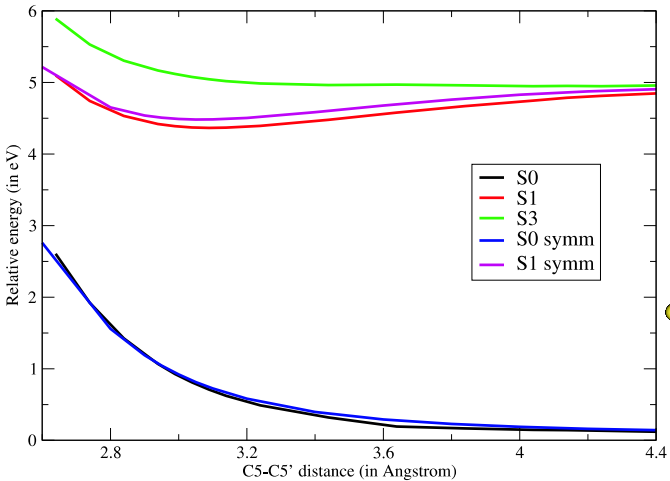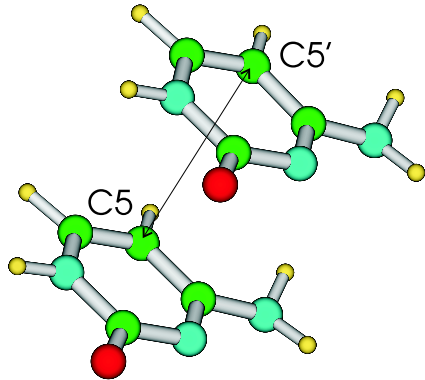

Supplement: pnas_0703298104_10.pdf [file pnas_0703298104_10.pdf]

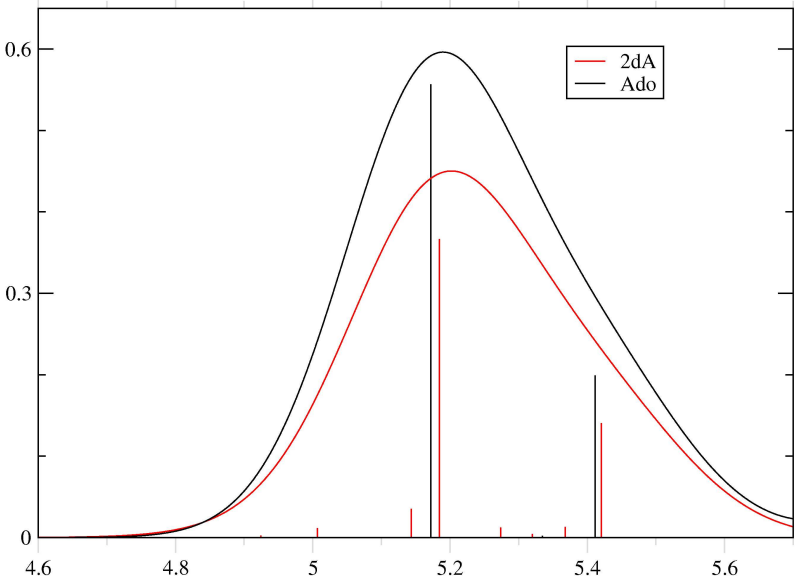

Supplement: pnas_0703298104_2.pdf [file pnas_0703298104_2.pdf]

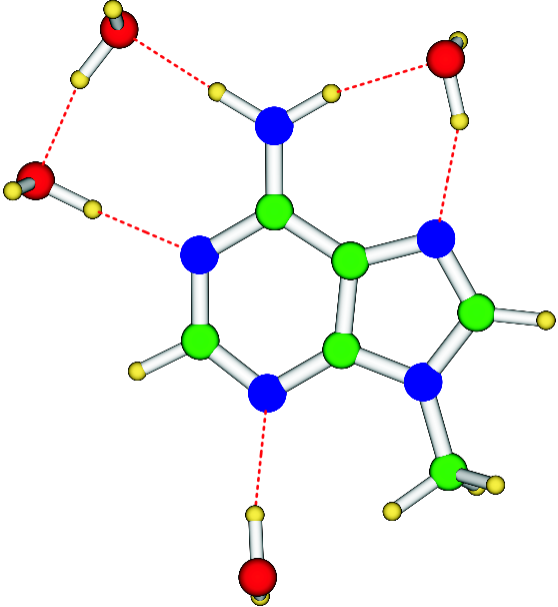

Supplement: pnas_0703298104_3.pdf [file pnas_0703298104_3.pdf]

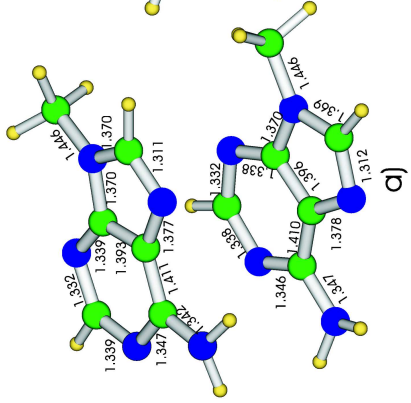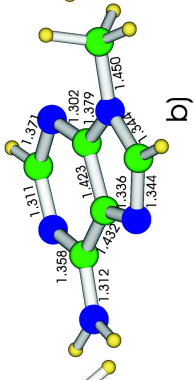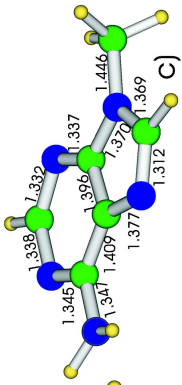

Supplement: pnas_0703298104_4.pdf [file pnas_0703298104_4.pdf]

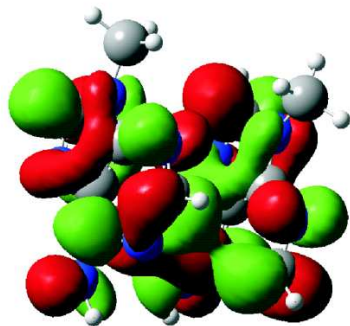

LUMO+1  $E=-0.014$   
LUMO  $E=-0.010$

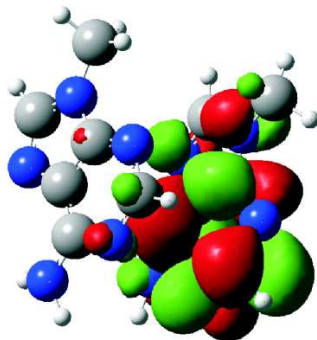

LUMO+3  $E=0.014$   
LUMO+2  $E=0.012$

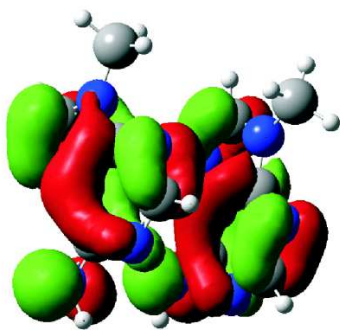

HOMO  $E=-0.225$   
HOMO-1  $E=-0.228$

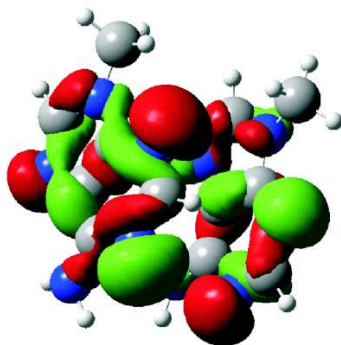

HOMO-2  $E=-0.265$   
HOMO-3  $E=-0.267$

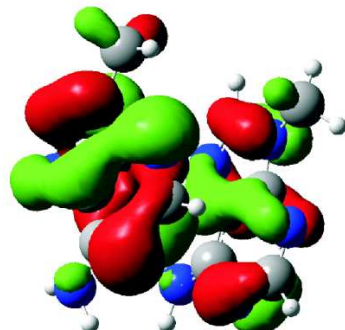

HOMO-4  $E=-0.269$   
HOMO-5  $E=-0.274$

Supplement: pnas_0703298104_5.pdf [file pnas_0703298104_5.pdf]

# Absorption spectra of 9-MA dimer

PCM/TD-PBE0/6-31G(d) calculations

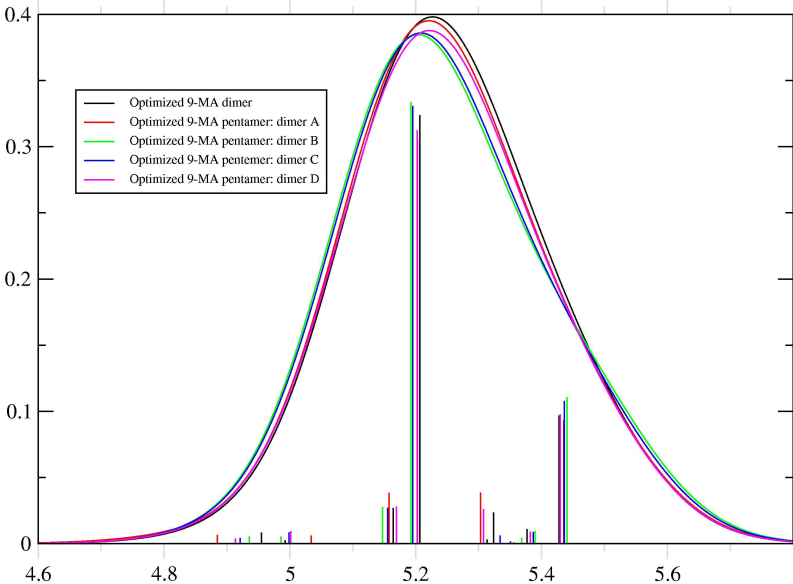

Supplement: pnas_0703298104_6.pdf [file pnas_0703298104_6.pdf]

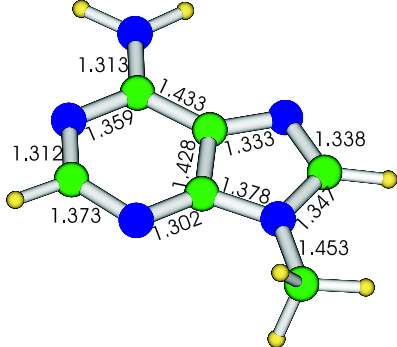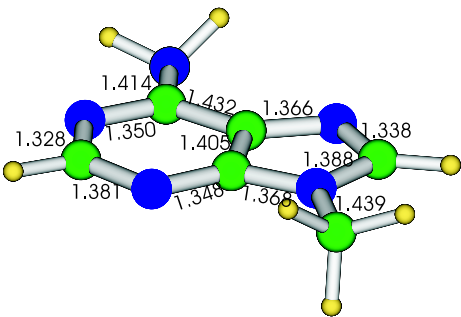

Supplement: pnas_0703298104_7.pdf [file pnas_0703298104_7.pdf]

# Computed absorption spectra in aqueous solution

6-31G(d) calculations

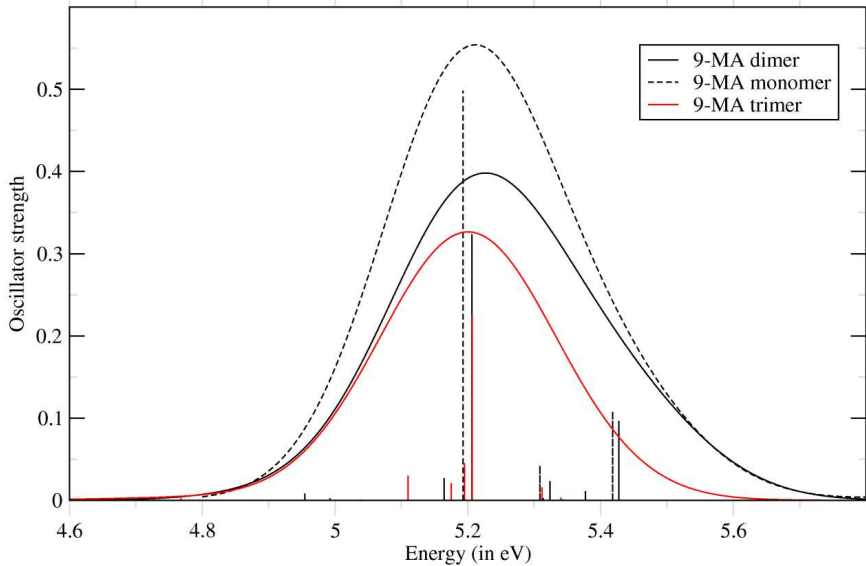

Supplement: pnas_0703298104_8.pdf [file pnas_0703298104_8.pdf]

from the  $S_{CT}$  minimum along the FC- $\rightarrow$ min $S_B$  path to the true min $S_{CT}$

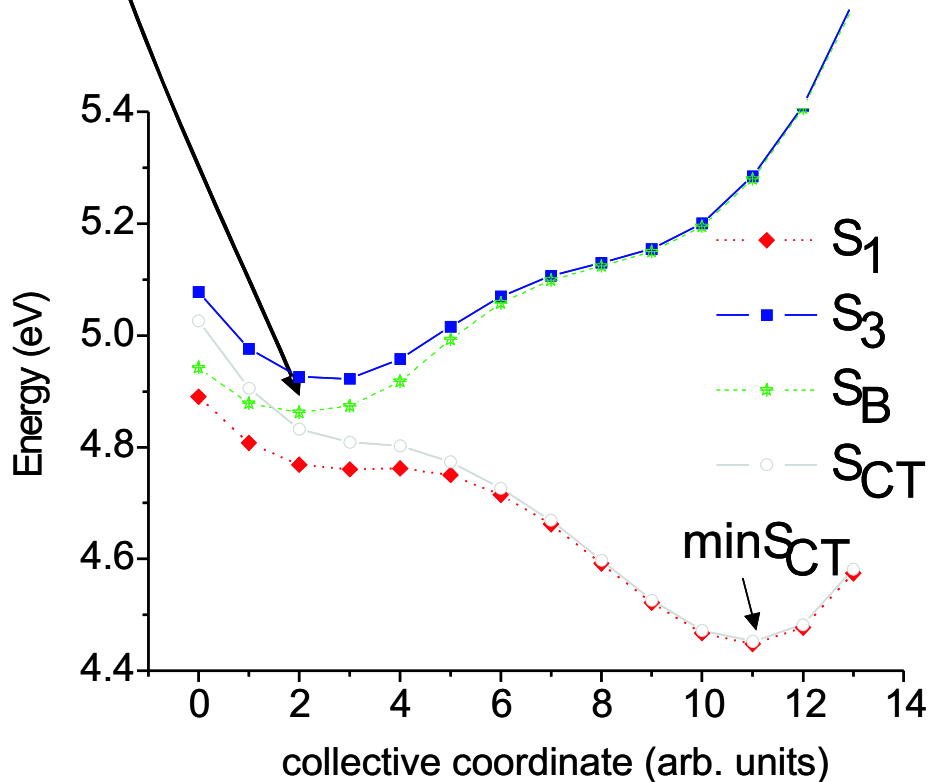

Supplement: pnas_0703298104_9.pdf [file pnas_0703298104_9.pdf]
